# Supplementary material for: A Combination of UV and Disinfectant for Inactivating Viable but Nonculturable State Pseudomonas aeruginosa: Efficiency and Mechanisms
Source: MDPI journal article supplement (doi:10.3390/w16091302), 2024-05-02
Supplement: s1 [file s1]

## Table of Contents

**Table S1.** Primers for the amplification of the *opr* gene.

**Table S2.** Second-order rate constants  $k$  ( $M^{-1} s^{-1}$ ) for probe compounds and free radical species.

**Table S3.** UPLC operation conditions for NB.

**Table S4.** UPLC operation conditions for MET.

**Table S5.** The disinfection effect of different disinfection methods on different pathogenic bacteria.

**Figure S1.** Water turbidity in spring and summer at each sampling point in Shanghai, China

**Figure S2.** Inactivation rate constants of *P. aeruginosa* under single disinfection method. Conditions:  $[NaClO]_0 = [PDS]_0 = [PAA]_0 = 40 \mu M$ ,  $[TBA]_0 = 50 mM$ , UV fluence rate =  $0.145 mW/cm^2$ , initial concentration of *P. aeruginosa* =  $3.32 \times 10^7$  CFU/mL, pH =  $7.0 \pm 0.2$ , and T =  $25 \pm 2^\circ C$ .

**Figure S3.** Inactivation rate constants of *P. aeruginosa* under combined disinfection. Conditions:  $[NaClO]_0 = [PDS]_0 = [PAA]_0 = 40 \mu M$ ,  $[TBA]_0 = 50 mM$ , UV fluence rate =  $0.145 mW/cm^2$ , initial concentration of *P. aeruginosa* =  $3.32 \times 10^7$  CFU/mL, pH =  $7.0 \pm 0.2$ , and T =  $25 \pm 2^\circ C$ .

**Figure S4.** Inactivation curves after the addition of excess TBA. Conditions:  $[NaClO]_0 = [PDS]_0 = [PAA]_0 = 40 \mu M$ ,  $[TBA]_0 = 50 mM$ , UV fluence rate =  $0.145 mW/cm^2$ , initial concentration of *P. aeruginosa* =  $3.32 \times 10^7$  CFU/mL, pH =  $7.0 \pm 0.2$ , and T =  $25 \pm 2^\circ C$ .

**Figure S5.** Degradation of NB(a) and MET(b) by UV/NaClO, UV/PDS, UV/PAA, and

UV. Conditions:  $[\text{NaClO}]_0 = [\text{PDS}]_0 = [\text{PAA}]_0 = 40 \mu\text{M}$ , UV fluence rate = 0.145  $\text{mW}/\text{cm}^2$ ,  $[\text{NB}] = 0.5 \mu\text{M}$ ;  $\text{pH} = 7.0 \pm 0.2$ ;  $T = 25 \pm 2^\circ\text{C}$ .

**Table S1.** Primers for the amplification of the *opr* gene.

| Target Gene    | Sequence              | Amplicon length |
|----------------|-----------------------|-----------------|
| <i>opr</i> -LF | ATGGAAATGCTGAAATTCGGC | 504 bp          |
| <i>opr</i> -LR | CTTCTTCAGCTCGACGCGACG |                 |

**Note:** “*opr*-LF” and “*opr*-LR” stand for *opr* Long Forward and *opr* Long Reverse primer.

**Table S2.** Second-order rate constants  $k$  ( $\text{M}^{-1} \text{s}^{-1}$ ) for probe compounds and free radical species.

|        | $\text{HO}\cdot$            | $\text{SO}_4\cdot^-$        | $\text{Cl}\cdot$ | $\text{Cl}_2\cdot^-$ |
|--------|-----------------------------|-----------------------------|------------------|----------------------|
| NB[1]  | $3.9 \times 10^9$           | $<10^6$                     | $<10^5$          | $2.0 \times 10^5$    |
| MET[2] | $3.8 (\pm 0.1) \times 10^9$ | $8.4 (\pm 0.3) \times 10^9$ | -                | -                    |

**Table S3.** UPLC operation conditions for NB.

| Parameter name     | Parameter condition           |
|--------------------|-------------------------------|
| mobile phase       | methanol /water ( 65% / 35% ) |
| UV detector set    | 270 nm                        |
| flow rate          | 1 mL/min                      |
| analysis time      | 10 min                        |
| injection volume   | 100 $\mu$ L                   |
| column temperature | 40°C                          |

**Table S4.** UPLC operation conditions for MET.

| Parameter name     | Parameter condition           |
|--------------------|-------------------------------|
| mobile phase       | methanol /water ( 20% / 80% ) |
| UV detector set    | 320 nm                        |
| flow rate          | 0.8 mL/min                    |
| analysis time      | 15 min                        |
| injection volume   | 100 $\mu$ L                   |
| column temperature | 40°C                          |

**Table S5.** The disinfection effect of different disinfection methods on different pathogenic bacteria.

| Process           | Pathogenic Bacteria             | Oxidant Concentration                                                                                                                | Inactivation rate constant | Reactivation  | Ref. |
|-------------------|---------------------------------|--------------------------------------------------------------------------------------------------------------------------------------|----------------------------|---------------|------|
| Chlorination      | tetracycline-resistant bacteria | [NaClO] =7 $\mu$ M<br>[NaClO] =14 $\mu$ M<br>[NaClO] =28 $\mu$ M                                                                     | 1.53<br>1.69<br>1.73       | not mentioned | [3]  |
| UV <sub>254</sub> | tetracycline-resistant bacteria | UV fluence rate = 3.59 mW/cm <sup>2</sup><br>UV fluence rate = 6.22 mW/cm <sup>2</sup><br>UV fluence rate = 9.03 mW /cm <sup>2</sup> | 0.42<br>0.6<br>1.01        | not mentioned | [3]  |
| UV/NaClO          | tetracycline-resistant bacteria | UV fluence rate = 9.03 mW/cm <sup>2</sup><br>[NaClO] =28 $\mu$ M                                                                     | 2.10                       | not mentioned | [3]  |
| Chlorination      | amoxicillin-resistant bacteria  | [NaClO] =7 $\mu$ M<br>[NaClO] =14 $\mu$ M<br>[NaClO] = 28 $\mu$ M                                                                    | 1.36<br>1.97<br>2.03       | not mentioned | [3]  |
| UV <sub>254</sub> | amoxicillin-resistant bacteria  | UV fluence rate = 3.59 mW/cm <sup>2</sup><br>UV fluence rate = 6.22 mW/cm <sup>2</sup><br>UV fluence rate = 9.03 mW/cm <sup>2</sup>  | 0.62<br>0.85<br>0.89       | not mentioned | [3]  |
| UV/NaClO          | amoxicillin-resistant bacteria  | UV fluence rate = 9.03 mW/cm <sup>2</sup><br>[NaClO] =28 $\mu$ M                                                                     | 1.91                       | not mentioned | [3]  |
| UV <sub>254</sub> | <i>Pseudomonas aeruginosa</i>   | UV fluence rate = 0.2 mW/cm <sup>2</sup>                                                                                             | not mentioned              | 24 h          | [4]  |
| NaClO             | <i>Pseudomonas aeruginosa</i>   | [NaClO] =14 $\mu$ M                                                                                                                  | not mentioned              | 24 h          | [4]  |
| UV/NaClO          | <i>Pseudomonas aeruginosa</i>   | UV fluence rate = 0.2 mW/cm <sup>2</sup><br>[NaClO] =14 $\mu$ M                                                                      | not mentioned              | 216 h         | [4]  |
| UV <sub>254</sub> | <i>Escherichia coli</i>         | UV fluence rate = 0.99 mW/cm <sup>2</sup>                                                                                            | 0.811                      | not mentioned | [5]  |

|                   |                                     |                                               |        |                  |     |
|-------------------|-------------------------------------|-----------------------------------------------|--------|------------------|-----|
| UV <sub>254</sub> | <i>Pseudomonas aeruginosa</i>       | UV fluence rate =<br>0.99 mW/cm <sup>2</sup>  | 0.448  | not<br>mentioned | [5] |
| UV <sub>254</sub> | <i>L.pneumophila</i>                | UV fluence rate =<br>0.99 mW/cm <sup>2</sup>  | 0.662  | not<br>mentioned | [5] |
| UV <sub>254</sub> | <i>Bacteriophage</i>                | UV fluence rate =<br>0.99 mW/cm <sup>2</sup>  | 0.085  | not<br>mentioned | [5] |
| UV <sub>254</sub> | <i>B. subtilis</i><br><i>spores</i> | UV fluence rate =<br>0.99 mW/cm <sup>2</sup>  | 0.099  | not<br>mentioned | [5] |
| UV <sub>254</sub> | <i>Pseudomonas aeruginosa</i>       | UV fluence rate =<br>0.145 mW/cm <sup>2</sup> | 0.0599 | 10 h             | [6] |
| NaClO             | <i>Pseudomonas aeruginosa</i>       | [NaClO] = 40 µM                               | 0.0478 | 16 h             | [6] |
| PAA               | <i>Pseudomonas aeruginosa</i>       | [PAA] = 40 µM                                 | 0.017  | not<br>mentioned | [6] |

---

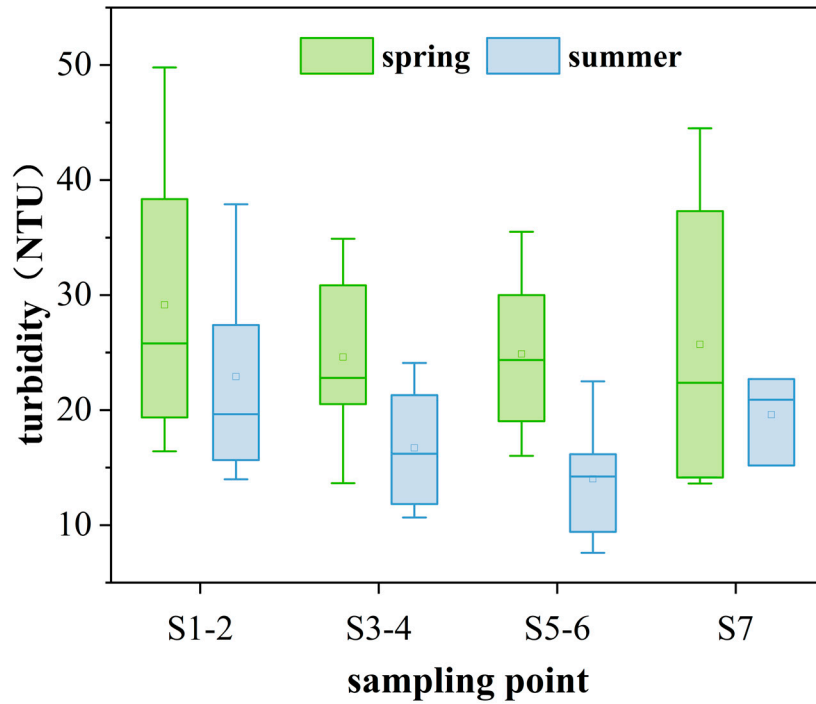

Figure S1. Water turbidity in spring and summer at each sampling point in Shanghai, China.

This study takes reservoir A as the starting point, and the pipe network passes from three pumping stations to the end of the pipe network, with a total length of 44.8 km. Seven sampling points are selected, including S1-2 points in the reservoir of reservoir A, S3-4 points in the inlet and outlet of pumping station B along the water transmission pipeline, and S5-6 points in the inlet and outlet of pumping station C along the pipeline. The last point is S7, the intake of pumping station D.

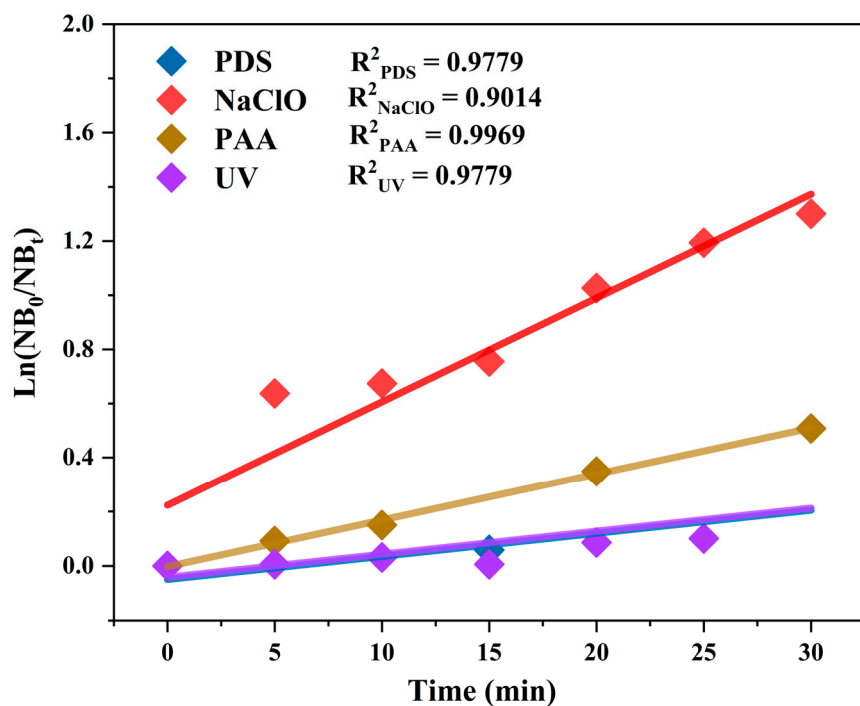

**Figure S2.** Inactivation rate constants of *P. aeruginosa* under single disinfection method. Conditions:  $[\text{NaClO}]_0 = [\text{PDS}]_0 = [\text{PAA}]_0 = 40 \mu\text{M}$ ,  $[\text{TBA}]_0 = 50 \text{ mM}$ , UV fluence rate =  $0.145 \text{ mW/cm}^2$ , initial concentration of *P. aeruginosa* =  $3.32 \times 10^7 \text{ CFU/mL}$ ,  $\text{pH} = 7.0 \pm 0.2$ , and  $T = 25 \pm 2^\circ\text{C}$ .

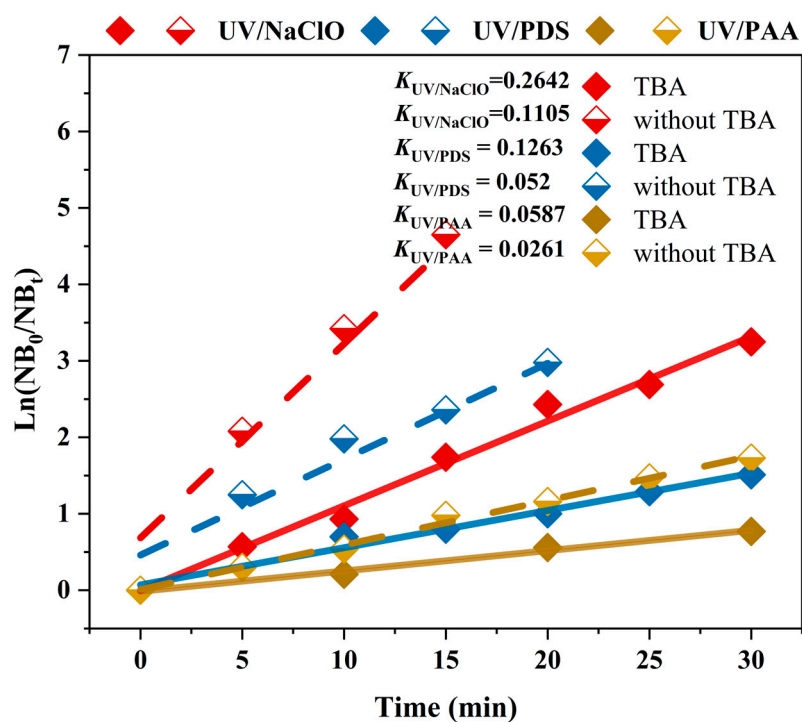

**Figure S3.** Inactivation rate constants of *P. aeruginosa* under combined disinfection. Conditions:  $[NaClO]_0 = [PDS]_0 = [PAA]_0 = 40 \mu M$ ,  $[TBA]_0 = 50 mM$ , UV fluence rate =  $0.145 mW/cm^2$ , initial concentration of *P. aeruginosa* =  $3.32 \times 10^7 CFU/mL$ ,  $pH = 7.0 \pm 0.2$ , and  $T = 25 \pm 2^\circ C$ .



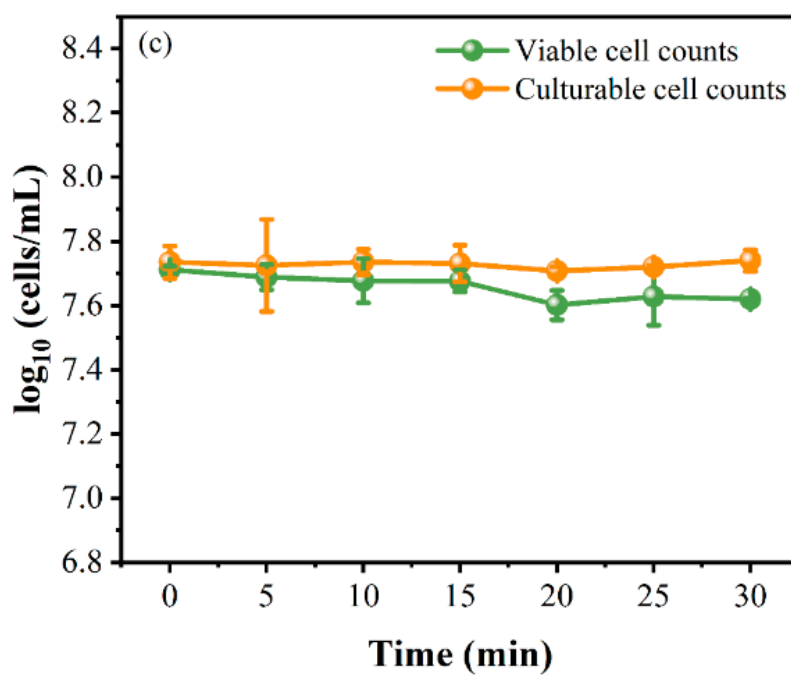

**Figure S4.** Inactivation curves after the addition of excess TBA. Conditions:  $[\text{NaClO}]_0 = [\text{PDS}]_0 = [\text{PAA}]_0 = 40 \mu\text{M}$ ,  $[\text{TBA}]_0 = 50 \text{ mM}$ , UV fluence rate =  $0.145 \text{ mW/cm}^2$ , initial concentration of *P. aeruginosa* =  $3.32 \times 10^7 \text{ CFU/mL}$ ,  $\text{pH} = 7.0 \pm 0.2$ , and  $T = 25 \pm 2^\circ\text{C}$ .

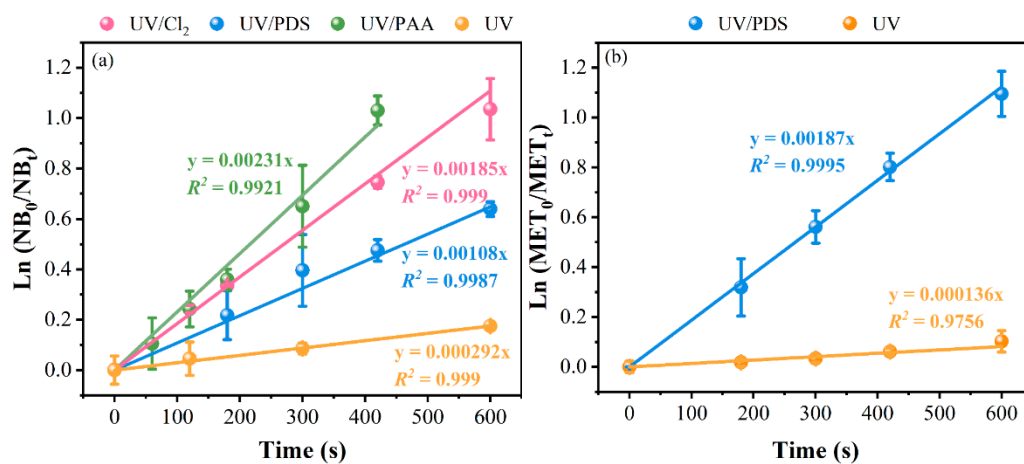

**Figure S5.** Degradation of NB and MET by UV/NaClO, UV/PDS, UV/PAA, and UV

(a), (b). Conditions:  $[\text{NaClO}]_0 = [\text{PDS}]_0 = [\text{PAA}]_0 = 40 \mu\text{M}$ , UV fluence rate =  $0.145$

$\text{mW}/\text{cm}^2$ ,  $[\text{NB}] = 0.5 \mu\text{M}$ ;  $\text{pH} = 7.0 \pm 0.2$ ;  $T = 25 \pm 2^\circ\text{C}$ .

1. Lei, Y.; Yu, Y.; Lei, X.; Liang, X.; Cheng, S.; Ouyang, G.; Yang, X. Assessing the Use of Probes and Quenchers for Understanding the Reactive Species in Advanced Oxidation Processes. *Environ. Sci. Technol.* **2023**, *57*, 5433–5444, doi:10.1021/acs.est.2c09338.
2. Wang, A.; Hua, Z.; Wu, Z.; Chen, C.; Hou, S.; Huang, B.; Wang, Y.; Wang, D.; Li, X.; Li, C.; et al. Insights into the Effects of Bromide at Fresh Water Levels on the Radical Chemistry in the UV/Peroxydisulfate Process. *Water Res.* **2021**, *197*, 117042, doi:10.1016/j.watres.2021.117042.
3. Phattarapattamawong, S.; Chareewan, N.; Polprasert, C. Comparative Removal of Two Antibiotic Resistant Bacteria and Genes by the Simultaneous Use of Chlorine and UV Irradiation (UV/Chlorine): Influence of Free Radicals on Gene Degradation. *Sci. Total Environ.* **2021**, *755*, 142696, doi:10.1016/j.scitotenv.2020.142696.
4. Wang, L.; Ye, C.; Guo, L.; Chen, C.; Kong, X.; Chen, Y.; Shu, L.; Wang, P.; Yu, X.; Fang, J. Assessment of the UV/Chlorine Process in the Disinfection of *Pseudomonas Aeruginosa*: Efficiency and Mechanism. *Environ. Sci. Technol.* **2021**, *55*, 9221–9230, doi:10.1021/acs.est.1c00645.
5. Rattanakul, S.; Oguma, K. Inactivation Kinetics and Efficiencies of UV-LEDs against *Pseudomonas Aeruginosa*, *Legionella Pneumophila*, and Surrogate Microorganisms. *Water Res.* **2018**, *130*, 31–37, doi:10.1016/j.watres.2017.11.047.
6. Fan, Z.; Zhu, H.; Tao, C.; Deng, N.; Huang, X. Quantitative Detection of VBNC State *Pseudomonas Aeruginosa* Contributing to Accurate Assessment of Microbial Inactivation in Drinking Water Disinfection. *Water* **2024**, *16*, 236, doi:10.3390/w16020236.
